# Supplementary material for: Tunable poly(lauryl methacrylate) surface grafting via SI-ATRP on a one-pot synthesized cellulose nanofibril macroinitiator core as a shear-thinning rheology modifier and drag reducer
Source: Royal Society of Chemistry journal article supplement (doi:10.1039/d3ra04610a), 2023-01-01
Supplement: d3ra04610a1.pdf [file d3ra04610a1.pdf]

### Supplementary Information

**Tunable poly(lauryl methacrylate) surface grafting via SI-ATRP on one-pot synthesized  
cellulose nanofibril macroinitiator core as shear-thinning rheology modifier and drag reducer**

Mengzhe Guo<sup>^</sup> and You-Lo Hsieh<sup>^#\*</sup>

<sup>^</sup>Chemical Engineering, <sup>#</sup>Biological and Agricultural Engineering, University of California at

Davis, Davis, California 95616-8722,

United States.

\*Email: [ylhsieh@ucdavis.edu](mailto:ylhsieh@ucdavis.edu); Tel: +1 530 752 084

## Br-CNF-g-PLMA Characterization

**Table. S1** SI-ATRP of LMA on Br-CNF characterizations and final copolymer DP estimations under various macroinitiator concentrations and polymerization time at 70 °C. LMA conversion (%) was determined by mass gain divided by initial LMA mass. CNF (w %) was determined by mass of Br-CNF divided by mass of Br-CNF-g-PLMA.

| Time | [M]  | [I] | Conversion | Br-CNF | DP eqn (1) |
|------|------|-----|------------|--------|------------|
| h    | mM   | mM  | %          | w%     |            |
| 1    | 800  | 9.6 | 4.0        | 28.1   | 3          |
| 3    |      |     | 19.5       | 7.4    | 16         |
| 4.5  |      |     | 39.1       | 3.8    | 32         |
| 6    |      |     | 48.6       | 3.1    | 40         |
| 24   |      |     | 52         | 2.9    | 43         |
| 1    | 800  | 16  | 36.7       | 6.6    | 18         |
| 3    |      |     | 51.4       | 4.8    | 25         |
| 4.5  |      |     | 63.5       | 3.9    | 31         |
| 6    |      |     | 74.8       | 3.4    | 37         |
| 12   |      |     | 80.3       | 3.1    | 39         |
| 24   |      |     | 92.7       | 2.7    | 46         |
| 1    | 1600 | 16  | 26.9       | 4.7    | 26         |
| 2    |      |     | 31.2       | 4.0    | 31         |
| 3    |      |     | 35.2       | 3.6    | 35         |
| 6    |      |     | 40.6       | 3.1    | 40         |
| 24   |      |     | 41.3       | 3.0    | 41         |

**Table. S2** SI-ATRP of LMA ( $[M]_0=800$  mM) on Br-CNF to Br-CNF-g-PLMA:  $DP_{mass}$ ,  $DP_{NMR}$ , WCA,  $M_n$  characterizations.

| Time | [I]  | Conversion | Br-CNF | DP <sub>mass</sub> | DP <sub>NMR</sub> | WCA   | M <sub>n</sub> |
|------|------|------------|--------|--------------------|-------------------|-------|----------------|
| (h)  | (mM) | (%)        | (w%)   |                    |                   | (°)   | KDa            |
| 1    | 9.6  | 4          | 28.1   | 3                  | 2                 | 80.9  | -              |
| 3    |      | 19.5       | 7.4    | 16                 | 14                | 84.6  | 264            |
| 4.5  |      | 39.1       | 3.8    | 32                 | 24                | 84.2  | 332            |
| 6    |      | 48.6       | 3.1    | 40                 | 31                | 86.2  | 616            |
| 24   | 16   | 92.7       | 2.7    | 46                 | 29                | 110.6 | 1381           |

|                                   | Pyridine | Ethyl Acetate | Chloroform | Toluene | Hexane |
|-----------------------------------|----------|---------------|------------|---------|--------|
| $\delta d$ (MPa) <sup>(1/2)</sup> | 19.0     | 15.8          | 17.8       | 18.0    | 14.9   |
| $\delta p$ (MPa) <sup>(1/2)</sup> | 8.8      | 5.3           | 3.1        | 1.4     | 0.0    |
| $\delta h$ (MPa) <sup>(1/2)</sup> | 5.9      | 7.2           | 5.7        | 2.0     | 0.0    |
| Relative Polarity                 | 0.302    | 0.228         | 0.259      | 0.099   | 0.009  |

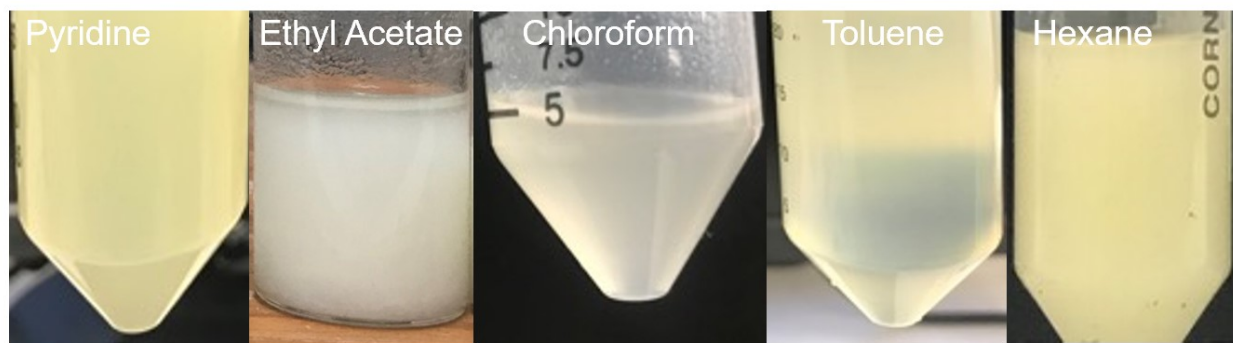

**Fig. S1** Redispersion of Br-CNF-g-PLMA (DP=46) into different solvents at 5 w/v%.

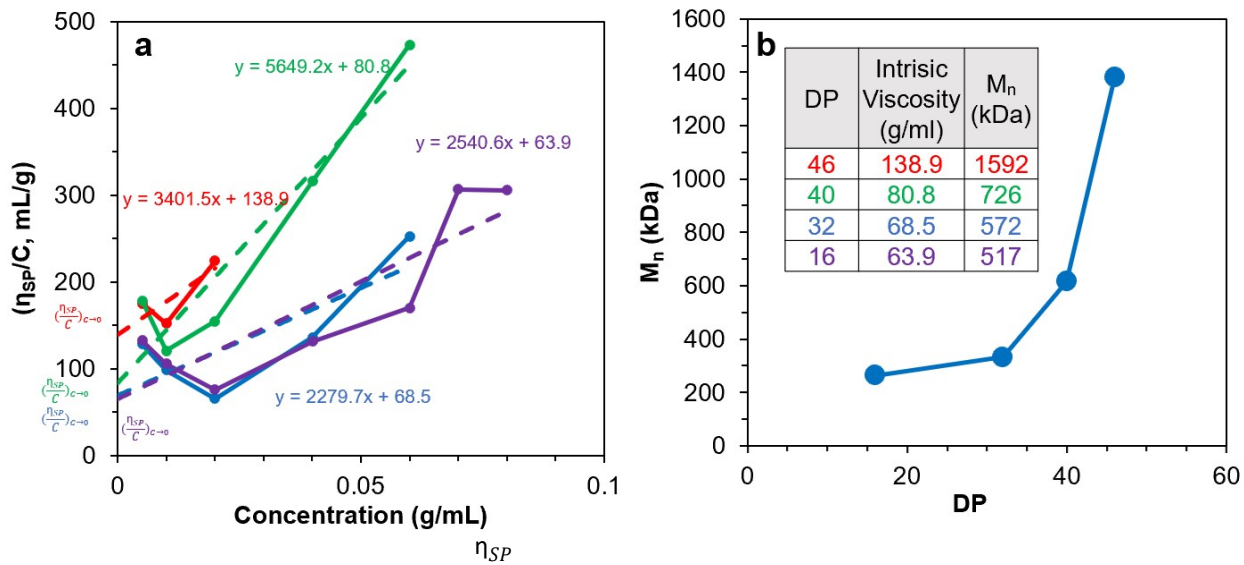

**Fig. S2** Plot of (a) reduced viscosity ( $\frac{\eta_{SP}}{C}$ ) verse concentration; (b)  $M_n$  verse estimated DP determined by eqn (1). Calculated intrinsic viscosities and  $M_n$  determined by eqn (2) were displayed in b.

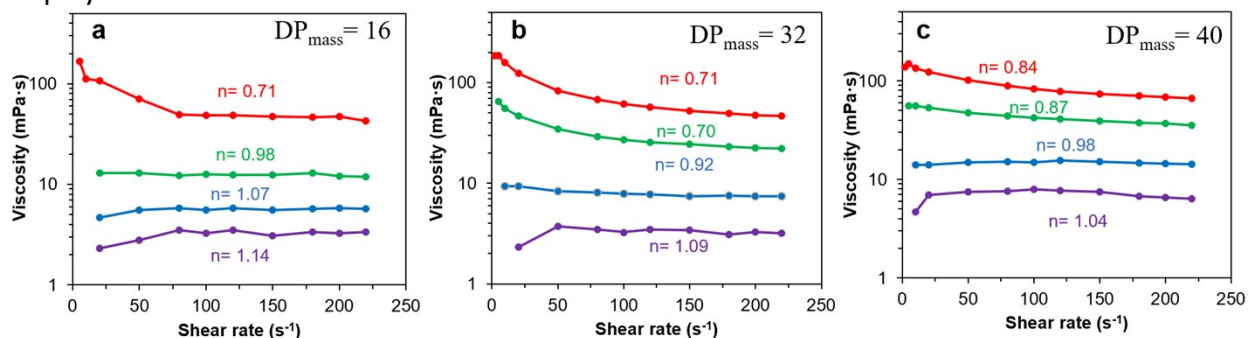

**Figure. S3** Viscosity of Br-CNF-g-PLMA in toluene verse shear rates at 25 °C with  $DP_{mass}$  of (a) 16, (b) 32, and (c) 40 at 4 w/v% (purple), 6 w/v% (blue), 8 w/v% (green) and 10 w/v% (red). The flow behavior index ( $n$ ) indicated.

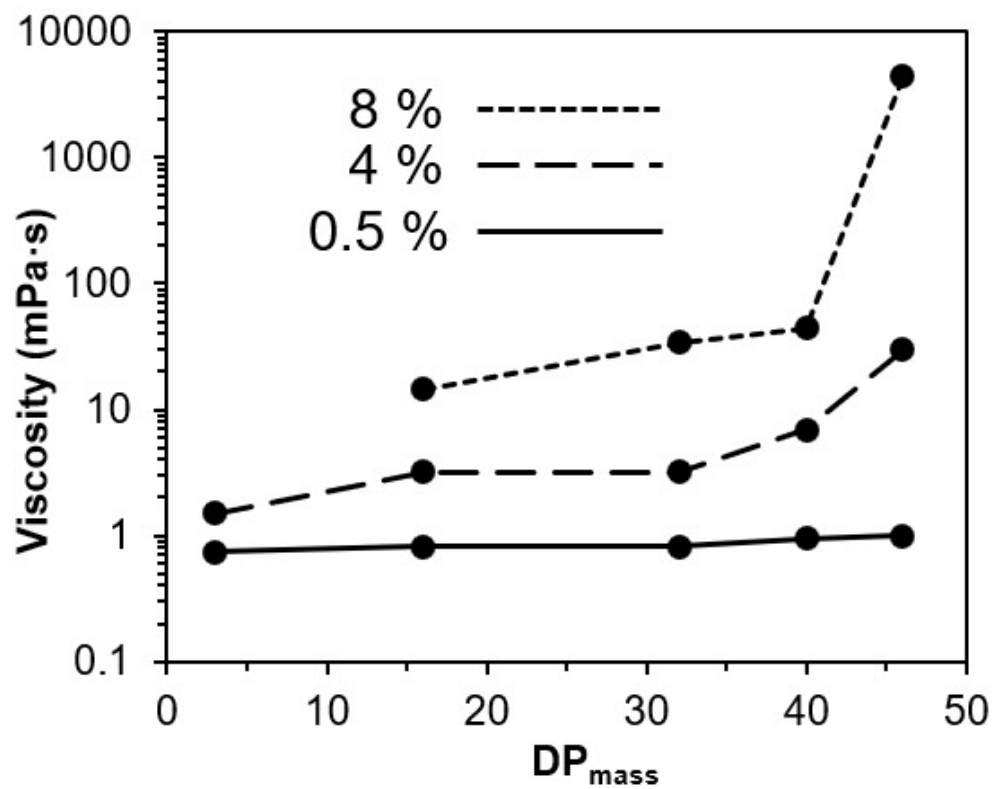

**Figure. S4** Br-CNF-g-PLMA in toluene viscosity as effect by DP (25 °C) at varied concentrations.

Average viscosity at shear rates from 1 to 220 s<sup>-1</sup> were used for all data points.
